# Supplementary material for: Quitting Smoking before and after Pregnancy: Study Methods and Baseline Data from a Prospective Cohort Study
Source: MDPI journal article supplement (doi:10.3390/ijerph191610170), 2022-08-17
Supplement: s1 [file s1]

**Table S1.** Comparison among survey sample versus CDC 2018 Natality data.

| Variable                                                     | Survey Sample<br>(N = 62) | CDC<br>(N=297.768) | Cohen's d<br>Values |
|--------------------------------------------------------------|---------------------------|--------------------|---------------------|
| Age, n(%)                                                    |                           |                    |                     |
| <= 24                                                        | 15 (24.2)                 | 100412 (33.7)      | 0.26                |
| 25 – 29                                                      | 12 (19.4)                 | 99175 (33.3)       | 0.40                |
| 30 – 34                                                      | 27 (43.6)                 | 64744 (21.7)       | 0.56                |
| >= 35                                                        | 8 (12.9)                  | 33437 (11.2)       | 0.09                |
| Education, n(%)                                              |                           |                    |                     |
| Less than high school                                        | 11 (17.7)                 | 62689 (21.1)       | 0.12                |
| High school/equivalent diploma                               | 22 (35.5)                 | 124634 (41.9)      | 0.15                |
| Some college or tech school                                  | 21 (33.9)                 | 94873 (31.9)       | 0.05                |
| College graduate                                             | 7 (11.3)                  | 12463 (4.2)        | 0.59                |
| Master or doctor                                             | 1 (1.6)                   | 3109 (1.0)         | 0.24                |
| Hispanic/Latina, n (%)                                       | 3 (4.8)                   | 21620 (7.3)        | 0.24                |
| Race, n (%)                                                  |                           |                    |                     |
| Black or African American only                               | 28 (45.2)                 | 37413 (12.6)       | 0.96                |
| White only                                                   | 22 (35.5)                 | 247345 (83.1)      | 1.21                |
| Multiracial                                                  | 12 (19.4)                 | 13010 (4.4)        | 0.92                |
| Married/partnered, n (%)                                     | 29 (46.7)                 | 85126 (29.3)       | 0.16                |
| WIC benefits receiver, n (%)                                 | 34 (54.8)                 | 163972 (55.1)      | 0.01                |
| BMI (kg/m <sup>2</sup> Based on pre-pregnancy weight), n (%) |                           |                    |                     |
| Underweight/Normal (<= 24.9)                                 | 21 (33.9)                 | 130724 (43.9)      | 0.23                |
| Overweight (25.0 – 29.9)                                     | 13 (21.0)                 | 72268 (24.3)       | 0.10                |
| Obesity (>= 30.0)                                            | 28 (45.2)                 | 94776 (31.8)       | 0.31                |
| Cigarettes Per Day, mean (SD)                                | 10.6 (7.1)                | 13.3 (10.4)        | 0.26                |
